# Supplementary material
Source: Springer Nature journal article supplement (https://www.springermedizin.de/resource/supplementary/13054_2011_552_MOESM7_ESM.pdf/9708758)

| Study                           | Restrictive |      | Routine    |      |      | Total      | Weight        | Mean Difference<br>[95% CI] |
|---------------------------------|-------------|------|------------|------|------|------------|---------------|-----------------------------|
|                                 | Mean        | SD   | Total      | Mean | SD   |            |               |                             |
| <b>Primary analysis: trials</b> |             |      |            |      |      |            |               |                             |
| Krivopal et al, 2003            | 6.76        | 4.03 | 51         | 7.93 | 5.64 | 43         | 32.4%         | -1.17 [-3.19, 0.85]         |
| Hejblum et al, 2009             | 9.94        | 8.75 | 306        | 9.82 | 8.24 | 305        | 67.6%         | 0.12 [-1.23, 1.47]          |
| <b>Patients</b>                 |             |      | <b>357</b> |      |      | <b>348</b> | <b>100.0%</b> | <b>-0.30 [-1.48, 0.89]</b>  |

**Overall effect: p=0.62; heterogeneity:  $I^2=8\%$**

**Sensitivity analysis: trials and observational studies**

|                      |      |      |             |      |      |             |               |                           |
|----------------------|------|------|-------------|------|------|-------------|---------------|---------------------------|
| Price et al, 1999    | 6.4  | 1.9  | 1588        | 6    | 1.4  | 1839        | 69.0%         | 0.40 [0.29, 0.51]         |
| Leong et al, 2000    | 1.7  | 3.7  | 100         | 2.1  | 3.7  | 100         | 9.4%          | -0.40 [-1.43, 0.63]       |
| Krinsley et al, 2003 | 4.9  | 10.9 | 1267        | 4.7  | 11   | 1297        | 13.1%         | 0.20 [-0.65, 1.05]        |
| Krivopal et al, 2003 | 6.76 | 4.03 | 51          | 7.93 | 5.64 | 43          | 2.7%          | -1.17 [-3.19, 0.85]       |
| Hejblum et al, 2009  | 9.94 | 8.75 | 306         | 9.82 | 8.24 | 305         | 5.8%          | 0.12 [-1.23, 1.47]        |
| <b>Patients</b>      |      |      | <b>3312</b> |      |      | <b>3584</b> | <b>100.0%</b> | <b>0.24 [-0.10, 0.58]</b> |

**Overall effect: p=0.16; heterogeneity:  $I^2=19\%$**

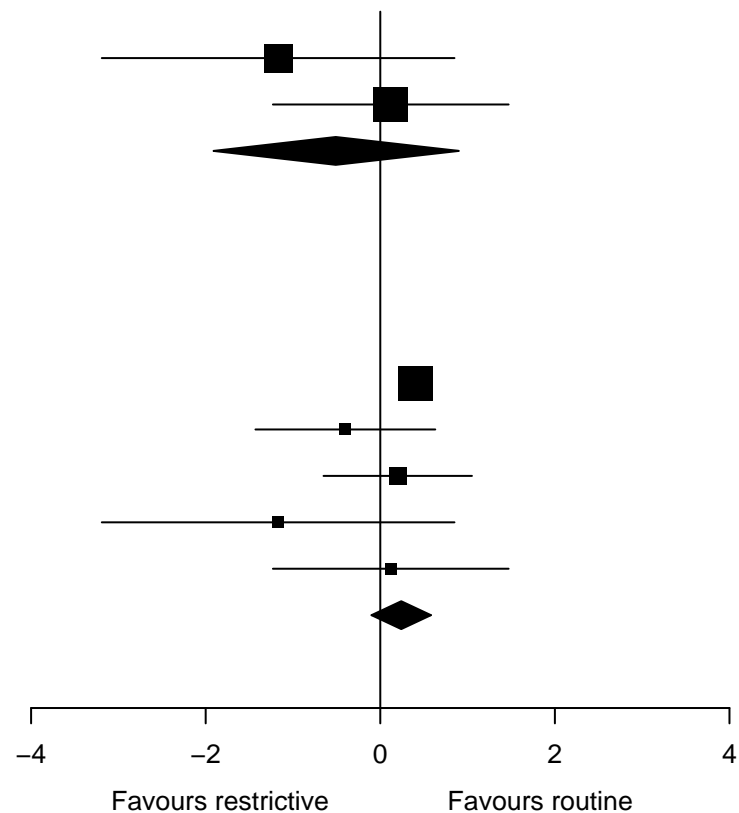

Supplement: MOESM7 [file 9708758]
